# Supplementary material for: Highly efficient, economical, and heterogeneous Ag catalyst and the cooperative effect of trace ammonia
Source: Royal Society of Chemistry journal article supplement (doi:10.1039/c4ra13229g), 2014-12-19
Supplement: c4ra13229g1.pdf [file c4ra13229g1.pdf]

## Highly efficient and economical Ag heterogeneous catalyst and cooperative effect of trace ammonia

Yunfei Pan<sup>a</sup>, Yucheng Ji<sup>a</sup>, Jianing Wang<sup>a</sup>, Zhaoqun Wang<sup>a\*</sup> and Yong Wang<sup>b</sup>

<sup>a</sup> Department of Polymer Science and Engineering, School of Chemistry and Chemical Engineering, Nanjing University, Nanjing, Jiangsu, 210093, P. R. China.

<sup>b</sup> Shenzhen Key Lab of Nano-Micro Materials Research, School of Chemical Biology & Biotechnology, Peking University Shenzhen Graduate School, Shenzhen, Guangdong 518055 (P. R. China)

E-mail: zqwang@nju.edu.cn

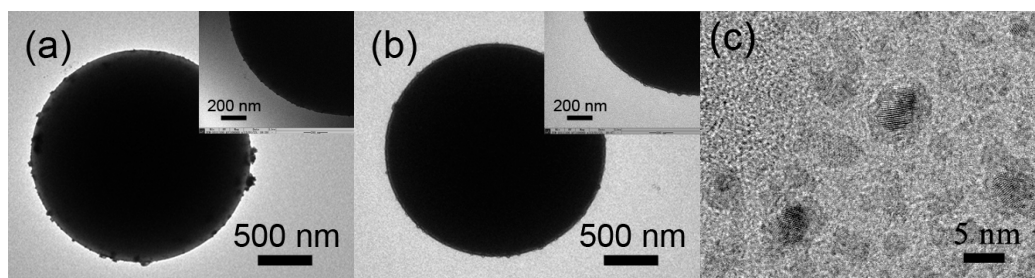

**Figure S1.** TEM images of PS/AgNP2 (a), PS/*m*AgNP2-10 (b), whose inserts show their highmagnification images; HRTEM of *m*AgNP2-10 (c).

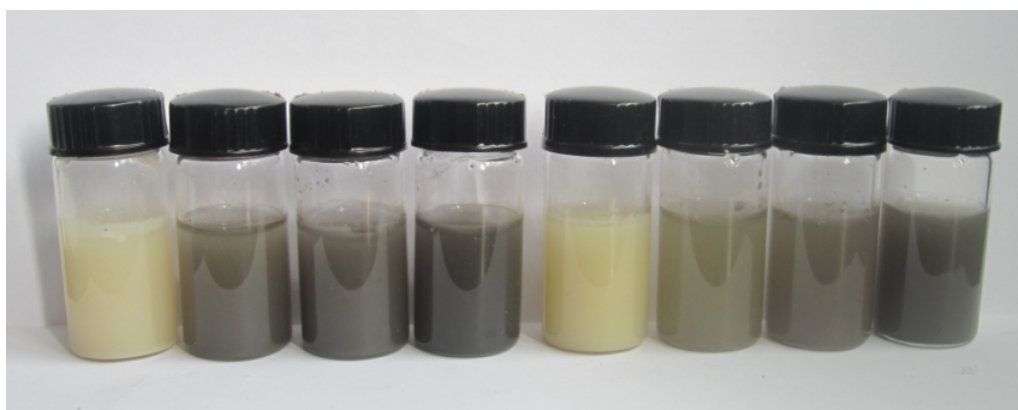

**Figure S2.** Photos of the resultant colloids: PS/AgNP1, PS/*m*AgNP1-2, PS/*m*AgNP1-10, PS/*m*AgNP1-20, PS/AgNP2, PS/*m*AgNP2-2, PS/*m*AgNP2-10, PS/*m*AgNP2-20, from left, in turn.

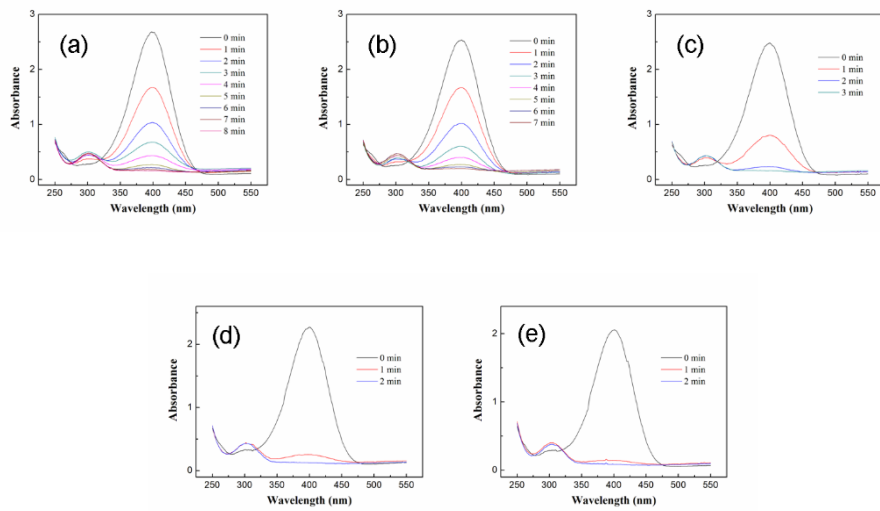

**Figure S3.** UV-visible absorption spectra of 4-NP during the reduction catalyzed by PS/*m*AgNP2-2, [M]= $1.0 \times 10^{-5}$  mol/L with NH<sub>3</sub> concentration 0 (a), 0.002 (b), 0.005 (c), 0.01 (d) and 0.02% (e).

**Table S1.** The TGA data of PS/Ag@AgAu composite particles

| Samples               | <i>W</i> (M) |
|-----------------------|--------------|
| PS/AgNP1              | <b>5.8%</b>  |
| PS/ <i>m</i> AgNP1-2  | <b>13.2%</b> |
| PS/ <i>m</i> AgNP1-10 | <b>15.4%</b> |
| PS/ <i>m</i> AgNP1-20 | <b>14.5%</b> |
| PS/AgNP2              | <b>1.4%</b>  |
| PS/ <i>m</i> AgNP2-2  | <b>7.3%</b>  |
| PS/ <i>m</i> AgNP2-10 | <b>8.6%</b>  |
| PS/ <i>m</i> AgNP2-20 | <b>10.5%</b> |

**Table S2.** The statistics of each sample in catalytic reduction of 4-NP

| Samples               | <i>C</i><br>(g/L) | [M]<br>(mM) | <i>k</i> <sup>[a]</sup><br>(s <sup>-1</sup> ) | <i>k</i> <sup>[b]</sup><br>(s <sup>-1</sup> ) | <i>k</i> /[M]<br>(L·mmol <sup>-1</sup> ·s <sup>-1</sup> ) | <i>k</i> '/[M]<br>(L·mmol <sup>-1</sup> ·s <sup>-1</sup> ) |
|-----------------------|-------------------|-------------|-----------------------------------------------|-----------------------------------------------|-----------------------------------------------------------|------------------------------------------------------------|
| PS/AgNP1              | 0.167             | 0.090       | 2.1×10 <sup>-3</sup>                          | 1.6×10 <sup>-2</sup>                          | 2.3×10 <sup>-2</sup>                                      | 1.8×10 <sup>-1</sup>                                       |
| PS/ <i>m</i> AgNP1-2  | 0.050             | 0.0592      | 7.7×10 <sup>-3</sup>                          | 1.4×10 <sup>-2</sup>                          | 1.3×10 <sup>-1</sup>                                      | 2.4×10 <sup>-1</sup>                                       |
| PS/ <i>m</i> AgNP1-10 | 0.050             | 0.066       | 1.1×10 <sup>-2</sup>                          | 2.4×10 <sup>-2</sup>                          | 1.7×10 <sup>-1</sup>                                      | 3.6×10 <sup>-1</sup>                                       |
| PS/ <i>m</i> AgNP1-20 | 0.050             | 0.0588      | 1.6×10 <sup>-2</sup>                          | 3.9×10 <sup>-2</sup>                          | 2.7×10 <sup>-1</sup>                                      | 6.6×10 <sup>-1</sup>                                       |
| PS/AgNP2              | 0.100             | 0.032       | 3.4×10 <sup>-3</sup>                          | 5.0×10 <sup>-3</sup>                          | 1.1×10 <sup>-1</sup>                                      | 1.6×10 <sup>-1</sup>                                       |
| PS/ <i>m</i> AgNP2-2  | 0.015             | 0.010       | 5.3×10 <sup>-3</sup>                          | 3.0×10 <sup>-2</sup>                          | 5.6×10 <sup>-1</sup>                                      | 3.2×10 <sup>0</sup>                                        |
| PS/ <i>m</i> AgNP2-10 | 0.015             | 0.010       | 1.5×10 <sup>-2</sup>                          | 3.9×10 <sup>-2</sup>                          | 1.5×10 <sup>0</sup>                                       | 3.9×10 <sup>0</sup>                                        |
| PS/ <i>m</i> AgNP2-20 | 0.015             | 0.0132      | 1.8×10 <sup>-2</sup>                          | 2.5×10 <sup>-2</sup>                          | 1.4×10 <sup>0</sup>                                       | 1.9×10 <sup>0</sup>                                        |

<sup>[a]</sup> without the addition of NH<sub>3</sub>;

<sup>[b]</sup> with the addition of NH<sub>3</sub> at the concentration of 0.01%.

**Table S3.** The statistics of PS/*m*AgNP2-2 in catalytic reduction of 4-NP with different concentration of NH<sub>3</sub>

| Samples                              | <i>C</i> (NH <sub>3</sub> )<br>(%) | <i>k</i> '<br>(s <sup>-1</sup> ) | <i>k</i> '/[M]<br>(L·mmol <sup>-1</sup> ·s <sup>-1</sup> ) | <i>k</i> '/ <i>k</i> |
|--------------------------------------|------------------------------------|----------------------------------|------------------------------------------------------------|----------------------|
| PS/ <i>m</i> AgNP2-2<br>([M]=9.95μM) | 0                                  | 5.3×10 <sup>-3</sup>             | 5.6×10 <sup>-1</sup>                                       | 1                    |
|                                      | 0.002                              | 6.0×10 <sup>-3</sup>             | 6.3×10 <sup>-1</sup>                                       | 1.1                  |
|                                      | 0.005                              | 1.4×10 <sup>-2</sup>             | 1.5×10 <sup>0</sup>                                        | 2.7                  |
|                                      | 0.01                               | 3.0×10 <sup>-2</sup>             | 3.2×10 <sup>0</sup>                                        | 5.7                  |
|                                      | 0.02                               | 3.8×10 <sup>-2</sup>             | 4.0×10 <sup>0</sup>                                        | 7.1                  |
